# Supplementary material for: Fc-modified IVIG with enhanced blood-brain barrier penetration ameliorates cognitive deficits and neuropathology in A53T α-synuclein transgenic mice
Source: Research Square preprint supplement (doi:10.21203/rs.3.rs-7354381/v1), 2025-09-04
Supplement: Supplementary file 1 [file 07a5534d013169b75be2a3db.xlsx]

## Sheet: fig.1
											normalize
	C	ug/ml	IVIG-1	IVIG-2	IVIG-3	IVIGA-1	IVIGA-2	IVIGA-3
		200	2.1102	2.1504	2.2251	2.1525	2.2152	2.1225
		100	2.15	2.082	2.2032	2.2254	2.2125	2.2214
		50	1.854	1.794	1.7584	1.8215	1.8428	1.7859
		25	1.215	1.1906	1.1584	1.1525	1.1025	1.3021
		12.5	0.524	0.5225	0.5263	0.6125	0.5865	0.5748
		6.25	0.254	0.2265	0.3425	0.2525	0.2635	0.3425
		3.125	0.1425	0.1225	0.1524	0.1925	0.1858	0.1754
		1.5	0.0758	0.0545	0.0859	0.0925	0.1025	0.0858
		0.75	0.0525	0.0525	0.0251	0.0526	0.0625	0.0415
	E		BEND3
					blank						IVIG						IVIGA
		BLANK	IVIG	IVIGA	0.016315	0.016596	0.024191	0.021097	0.019128	0.019972	0.088608	0.127426	0.1218	0.088608	0.091421	0.115893	0.959775	1.18565	1.02897	0.946554	0.887201	0.991561
		58	315	3412
		59	453	4215
		86	433	3658
		75	315	3365
		68	325	3154
		71	412	3525
	G	h	IVIG-A			IVIG-A
		0-blank	3349.6	2184.52	1747.62	1747.62	1747.62	1456.35
		1	231997	201064	255196	23199.7	20106.4	25519.6
		3	425327	456260	533592	71659.7	60189.5	67922.7
		6	274638	261633	269876	23094.8	39270.5	26987.6
		12	140465	139198	166330	38804.4	38677.7	39934.6
		24	114993	119712	119217	40626.3	36729.1	33766.9
	I	IVIG	IVIG-A		IVIG						IVIGA
		54.25	645.6		0.037056	0.031209	0.046209	0.035082	0.035055	0.038497	0.440984	0.399276	0.518204	0.434631	0.420328	0.378825
		45.69	584.54
		67.65	758.65
		51.36	636.3
		51.32	615.36
		56.36	554.6
	J			TNFA
		blank	NC	ivig	IVIGA
		15.54	256.36	112.36	102.85	blank						NC						IVIG						IVIGA
		25.54	224.5	89.36	114.65	0.133966	0.220172	0.424569	0.218103	0.183621	0.281034	2.21	1.93535	1.85655	1.85603	1.85862	1.94224	0.968621	0.770345	1.21767	1.31293	0.804828	0.987931	0.886638	0.988362	1.12379	1.12802	0.987586	0.881897
		49.25	215.36	141.25	130.36
		25.3	215.3	152.3	130.85
		21.3	215.6	93.36	114.56
		32.6	225.3	114.6	102.3
	K		IL-1β
		blank	NC	ivig	IVIGA
		25.32	185.62	81.54	78.36		blank						NC						IVIG						IVIGA
		26.69	178.65	78.59	74.25		0.30506	0.321566	0.357229	0.34494	0.257349	0.284337	2.23639	2.15241	2.04048	2.23723	2.10072	1.83976	0.98241	0.946867	1.01904	1.04699	1.03133	1.13976	0.944096	0.894578	0.959639	1.04337	1.14036	1.03193
		29.65	169.36	84.58	79.65
		28.63	185.69	86.9	86.6
		21.36	174.36	85.6	94.65
		23.6	152.7	94.6	85.65

## Sheet: fig.2
	C	hindlimb clasping scores
		WT	Control	IVIG-A
		0	1	1
		0	2	1
		0	2	1
		0	3	2
		1	3	0
		1	2	1
D	rotarod
		WT						Control						IVIG-A
	day1	181.5	180.333	182.857	185.65	185.65	178.65	113.8	117.8	123.2	115.3	106.3	113.3	119.25	128.5	138.5	136.6	125.3	115.3
	day2	210.833	202	226.833	205.65	223.6	235.25	144.2	117.8	129	153.3	125.6	131.5	184.5	190	174	184	152.6	189.6
	day3	237.167	243.833	227.833	230.6	250.3	236.35	144	159.8	149.4	159.6	145.6	149.6	184.5	187	207.5	205.3	189.6	200.51
	WT						Ctrl						IVIGA
day1	0.762605	0.757703	0.768307	0.780042	0.780042	0.75063	0.478151	0.494958	0.517647	0.484454	0.446639	0.47605	0.50105	0.539916	0.581933	0.57395	0.526471	0.484454
day2	0.885854	0.848739	0.953081	0.864076	0.939496	0.988445	0.605882	0.494958	0.542017	0.644118	0.527731	0.552521	0.77521	0.798319	0.731092	0.773109	0.641176	0.796639
day3	0.996499	1.02451	0.957283	0.968908	1.05168	0.993067	0.605042	0.671429	0.627731	0.670588	0.569748	0.628571	0.77521	0.785714	0.871849	0.862605	0.946639	0.896218
	F	Total distance
		WT	Control	IVIG-A		WT						Ctrl						IVIGA
		392.553	287	288.521		1.00655	1.08974	1.00781	1.04259	0.868098	0.987179	0.735897	0.694872	0.730769	0.651282	0.68718	0.707692	0.739798	0.805128	1.06783	0.85099	0.88764	0.874359
		425	271	314
		393.046	285	416.452
		406.611	254	331.886
		338.558	268	346.179
		385	276	341
	G	Time in centre				WT						Ctrl						IVIGA
		WT	Control	IVIG-A		1.21381	0.741586	0.995055	0.945886	0.98735	1.11632	0.698834	0.669609	0.603204	0.46964	0.690646	0.519062	0.981485	0.918574	0.879731	0.840293	0.623511	0.728208
		49.89	21	29.65
		33	19	30.2
		40.95	18	38.36
		40.27	12.49	29.2
		35	19.38	22.6
		45	15	26
	H	Number of rearing				WT						Ctrl						IVIGA
		WT	Control	IVIG-A		1.2684	0.780553	1.12204	0.926907	1.12204	0.780553	2.63437	2.73194	3.61006	2.43923	3.02464	2.63437	2.14652	1.46354	1.70746	1.65868	1.56111	1.56111
		26	54	44
		16	56	30
		23	74	35
		19	50	34
		23	62	32
		16	54	32
	I		Time to turn (s)
		WT	Control	IVIG-A
		2	9	7
		1	9	3
		1	6	5
		1	7	5
		2	7	5
		2	9	5
		J		Time to descend (s)
			WT	Control	IVIG-A
			6	14	11
			5	12	9
			7	15	9
			5	15	11
			6	15	8
			5	14	10
	K	WT	A	B		A	NEW		CTRL	A	B		A	NEW		IVIG-A	A	B		A	NEW	WT						Ctrl						IVIGA
		1	3	3		2	4		1	2	2		12	11		1	3	2		8	11	1.01457	1.01457	0.92635	1.1414	0.887753	1.01457	0.758819	0.831087	0.793311	0.793311	0.746645	0.854335	0.938539	1.08074	0.972668	0.884244	0.938539	0.911876
		2	8	7		2	4		2	1	1		10	11		2	6	4		1	2
		3	11	9		9	14		3	15	11		3	3		3	4	5		6	9
		4	13	15		1	3		4	3	3		1	1		4	10	7		5	6
		5	3	4		15	21		5	3	2		9	8		5	8	7		8	11
		6	12	8		1	2		6	3	3		6	7		6	6	6		7	9
	M	WT	Control	IVIG-A		WT						Ctrl						IVIGA
		120.58	71	89		0.886618	1.17853	0.904118	0.872647	1.29485	0.847941	0.522059	0.470588	0.411912	0.411765	0.503676	0.477941	0.654412	0.720588	0.580882	0.654412	0.765735	0.698529
		160.28	64	98
		122.96	56.02	79
		118.68	56	89
		176.1	68.5	104.14
		115.32	65	95
	N	WT			CTRL			IVIG-A
		A	C	B	A	C	B	A	C	B
		9	17	9	9	6	6	6	9	5
		7	11	7	8	6	6	5	9	8
		6	11	7	7	6	9	3	4	3
		8	12	5	11	9	11	6	8	4
		3	8	5	3	3	5	8	9	9
		6	9	5	5	6	6	5	8	4
	WT						Ctrl						IVIGA
	1.03343	0.93617	0.975177	1.02128	1.06383	0.957447	0.607903	0.638298	0.580271	0.617708	0.580271	0.750939	0.957447	0.870406	0.851064	0.945627	0.736498	1.00125

## Sheet: fig.3
	B	SN			CTX
		WT	Control	IVIG-A	WT	Control	IVIG-A	WT						Ctrl						IVIGA
		54	9264	4327	48	2381	1554	0.006585	0.00622	0.009146	0.008293	0.007805	0.007195	1.12976	0.794146	0.971585	0.963171	1.09378	1.04732	0.527683	0.398537	0.689878	0.710366	0.443415	0.482683
		51	6512	3268	54	2557	1197	0.019208	0.021609	0.013605	0.019608	0.033613	0.022009	0.952781	1.02321	1.12445	1.02761	0.970388	0.90076	0.621849	0.478992	0.789916	0.618247	0.804722	0.743497
		75	7967	5657	34	2810	1974
		68	7898	5825	49	2568	1545
		64	8969	3636	84	2425	2011
		59	8588	3958	55	2251	1858
			SN			CTX		WT						Ctrl						IVIGA
	D	WT	Control	IVIG-A	WT	Control	IVIG-A	0.014715	0.013959	0.012749	0.015748	0.01668	0.015471	1.01419	0.999244	0.947012	0.994482	0.999169	1.04603	0.660779	0.719462	0.638354	0.747203	0.558229	0.635532
		584	40251	26225	544	28340	17857	0.018342	0.020769	0.019353	0.01969	0.015307	0.024074	0.955528	1.01962	1.04606	0.962372	0.997775	1.01868	0.602077	0.625375	0.817661	0.514616	0.588489	0.549749
		554	39658	28554	616	30241	18548
		506	37585	25335	574	31025	24251
		625	39469	29655	584	28543	15263
		662	39655	22155	454	29593	17454
		614	41515	25223	714	30213	16305
			SN			CTX		WT						Ctrl						IVIGA
	E	WT	Control	IVIG-A	WT	Control	IVIG-A	0.014775	0.014775	0.014256	0.012945	0.01231	0.01231	0.98841	0.959984	1.0047	1.03104	1.01271	1.00321	0.652338	0.627227	0.725437	0.710157	0.598628	0.652771
		1025	68568	45254	1202	68359	45258	0.017236	0.014698	0.015458	0.016519	0.020434	0.015329	0.98024	0.964051	0.998867	1.01847	1.04055	0.99782	0.648981	0.734961	0.855858	0.648924	0.696589	0.720364
		1025	66596	43512	1025	67230	51254
		989	69698	50325	1078	69658	59685
		898	71525	49265	1152	71025	45254
		854	70254	41528	1425	72565	48578
		854	69595	45284	1069	69585	50236

## Sheet: fig.4
	B	WT	Control	IVIG-A	WT						Ctrl						IVIGA
		20538	4571	9526	1.00401	0.901789	0.950772	0.989978	1.05221	1.10114	0.223455	0.304703	0.348162	0.265154	0.256844	0.222184	0.465682	0.530798	0.451652	0.7456	0.550156	0.480837
		18447	6233	10858
		19449	7122	9239
		20251	5424	15252
		21524	5254	11254
		22525	4545	9836
	C	WT	Control	IVIG-A	WT						Ctrl						IVIGA
		14209	4318	12387	1.05197	0.969127	1.00711	0.927297	0.989487	1.0553	0.319686	0.448138	0.223662	0.307396	0.293033	0.269194	0.91708	0.599541	0.645591	0.635522	0.677575	0.660546
		13090	6053	8098
		13603	3021	8720
		12525	4152	8584
		13365	3958	9152
		14254	3636	8922
	D	WT	Control	IVIG-A	WT						Ctrl						IVIGA
		11033	1670	7024	0.979205	1.14881	0.783329	0.90989	1.02278	1.156	0.148217	0.0806759	0.132774	0.111296	0.082096	0.0796997	0.623397	0.523284	0.763981	0.761939	0.674075	0.687121
		12944	909	5896
		8826	1496	8608
		10252	1254	8585
		11524	925	7595
		13025	898	7742
	F	WT	Control	IVIG-A	WT						Ctrl						IVIGA
		5931	1668	3165	0.920177	0.95012	1.04445	0.987511	1.11008	0.987666	0.258785	0.269335	0.271042	0.210069	0.240168	0.237065	0.49104	0.465596	0.451167	0.391746	0.351408	0.462648
		6124	1736	3001
		6732	1747	2908
		6365	1354	2525
		7155	1548	2265
		6366	1528	2982
	G	WT	Control	IVIG-A	WT						Ctrl						IVIGA
		4254	1625	2754	0.990223	0.981145	1.00675	1.13082	0.923883	0.967179	0.378259	0.368948	0.381518	0.266527	0.354981	0.292598	0.641061	0.664339	0.680168	0.587756	0.562151	0.469041
		4215	1585	2854
		4325	1639	2922
		4858	1145	2525
		3969	1525	2415
		4155	1257	2015
	H	WT	Control	IVIG-A	WT						Ctrl						IVIGA
		345	89	189	0.971831	1.0338	1.09014	0.726761	1.03944	1.13239	0.250704	0.253521	0.340845	0.323944	0.250704	0.352113	0.532394	0.622535	0.597183	0.709859	0.526761	0.447887
		367	90	221
		387	121	212
		258	115	252
		369	89	187
		402	125	159
	J	WT	Control	IVIG-A	WT						Ctrl						IVIGA
		4534	2215	3765	1.06657	1.04281	0.969419	0.932722	0.976711	1.012	0.521054	0.499882	0.529993	0.619854	0.530228	0.506234	0.885674	0.855328	0.818866	0.907786	0.880969	0.741473
		4433	2125	3636
		4121	2253	3481
		3965	2635	3859
		4152	2254	3745
		4302	2152	3152
	K	WT	Control	IVIG-A	WT						Ctrl						IVIGA
		3213	1654	2624	0.925937	0.957061	1.05014	0.987032	0.969741	1.1098	0.476657	0.565994	0.540634	0.439481	0.417291	0.554755	0.756196	0.834294	0.793084	0.851585	0.714697	0.727666
		3321	1964	2895
		3644	1876	2752
		3425	1525	2955
		3365	1448	2480
		3851	1925	2525
	L	WT	Control	IVIG-A	WT						Ctrl						IVIGA
		4562	1432	2657	0.98425	0.955987	1.02524	0.998706	1.01726	1.01877	0.308954	0.329666	0.332902	0.367853	0.315426	0.329018	0.573247	0.617691	0.643581	0.545415	0.488673	0.592233
		4431	1528	2863
		4752	1543	2983
		4629	1705	2528
		4715	1462	2265
		4722	1525	2745
	M	WT	Control	IVIG-A	WT						Ctrl						IVIGA
		2122	896	1653	0.93439	0.98679	1.11493	0.89476	0.999119	1.07001	0.39454	0.43461	0.477323	0.507266	0.40775	0.395421	0.727873	0.630559	0.590929	0.69793	0.772347	0.535007
		2241	987	1432
		2532	1084	1342
		2032	1152	1585
		2269	926	1754
		2430	898	1215

## Sheet: fig.5
	B		SN			CTX				SN			CTX
		WT	Control	IVIG-A	WT	Control	IVIG-A		WT	Control	IVIG-A	WT	Control	IVIG-A
		835	4541	3585	690	4071	3194		0.1665	0.905484	0.714855	0.149707	0.883272	0.692992
		1075	5797	1927	515	4454	3509		0.214357	1.15593	0.384247	0.111738	0.96637	0.761337
		1001	4352	2269	682	4847	3012		0.199601	0.867797	0.452443	0.147971	1.05164	0.653504
		959	5548	1958	1102	5165	3325		0.191226	1.10628	0.390429	0.239097	1.12063	0.721415
		948	5265	2325	958	4858	2659		0.189033	1.04985	0.463609	0.207854	1.05402	0.576915
		1125	4585	2265	525	4259	3025		0.224327	0.914257	0.451645	0.113908	0.924062	0.656325
			5014.67			4609
	D		SN			CTX			WT						Ctrl						IVIGA
		WT	Control	IVIG-A	WT	Control	IVIG-A	SN	0.145736	0.13666	0.086996	0.090079	0.093846	0.119706	0.843247	1.21401	0.876642	0.899761	1.0318	1.13455	0.384291	0.303973	0.454847	0.591677	0.426248	0.432413
		851	4924	2244	537	8837	3033	CTX	0.089336	0.067876	0.050075	0.142738	0.075861	0.113958	1.47014	1.07187	0.73615	0.852604	1.03394	0.835967	0.504575	0.34204	0.611379	0.431709	0.560472	0.624023
		798	7089	1775	408	6443	2056
		508	5119	2656	301	4425	3675
		526	5254	3455	858	5125	2595
		548	6025	2489	456	6215	3369
		699	6625	2525	685	5025	3751
	E		SN			CTX			WT						Ctrl						IVIGA
		WT	Control	IVIG-A	WT	Control	IVIG-A		0.480959	0.534556	0.476728	0.481899	0.726375	0.669958	1.05568	0.87505	0.936571	1.18712	0.994358	0.950635	0.697696	0.703808	0.80583	0.687353	0.716972	0.818054
		1023	2245.42	1484	1067	1818	1561		0.578633	0.664859	0.586226	0.555857	0.625813	0.555857	0.9859	1.07104	0.990781	0.899132	1.00759	1.04393	0.846529	0.696855	0.664859	0.718547	0.624729	0.658351
		1137	1861.23	1497	1226	1975	1285
		1014	1992.09	1714	1081	1827	1226
		1025	2525	1462	1025	1658	1325
		1545	2115	1525	1154	1858	1152
		1425	2022	1740	1025	1925	1214
	F		SN			CTX
		WT	Control	IVIG-A	WT	Control	IVIG-A		WT						Ctrl						IVIGA
		325	472	359	210	845	530		0.553663	0.425894	0.494037	0.48552	0.504259	0.570698	0.804089	0.998296	1.06303	1.12607	1.11414	0.896082	0.611584	0.625213	0.642249	0.609881	0.672913	0.637138
		250	586	367	379	659	540		0.292479	0.527855	0.451253	0.31337	0.342618	0.345404	1.17688	0.917827	0.98468	1.19499	0.763231	0.969359	0.738162	0.752089	0.604457	0.601671	0.637883	0.771588
		290	624	377	324	707	434
		285	661	358	225	858	432
		296	654	395	246	548	458
		335	526	374	248	696	554
													p-ikkb
	H	p-ikkb				ikkb							WT	Control	IVIG-A		WT	Control	IVIG-A
		WT	Control	IVIG-A		WT	Control	IVIG-A					1.12697e-05	6.14628e-05	4.37191e-05		0.208356	1.13633	0.808283
		56	265	175		3252	3254	3021					1.22729e-05	5.05518e-05	2.96754e-05		0.226902	0.934607	0.548641
		54	254	154		3252	3526	3652					1.28704e-05	5.2459e-05	3.92104e-05		0.23795	0.969867	0.724925
		61	258	185		3326	3225	3102					9.20951e-06	5.38229e-05	2.66761e-05		0.170266	0.995084	0.493191
		45	225	135		3202	3155	3445					8.74405e-06	5.52336e-05	2.88408e-05		0.161661	1.02117	0.533212
		48	265	145		3602	3220	3252					1.07081e-05	5.10029e-05	4.5079e-05		0.197972	0.942947	0.833426
		49	245	185		3145	3152	3152					p-p65	5.40888e-05		5.40888e-05
													WT	Control	IVIG-A		WT	Control	IVIG-A
													3.93966e-05	9.68586e-05	5.3236e-05		0.449162	1.10429	0.606945
	I	p-p65				p65							5.41524e-05	8.04899e-05	4.61415e-05		0.617394	0.917668	0.526061
		WT	Control	IVIG-A		WT	Control	IVIG-A					4.15335e-05	8.33631e-05	4.05646e-05		0.473525	0.950426	0.462478
		152	298	164		2525	2322	2325					4.80127e-05	8.85898e-05	5.08625e-05		0.547394	1.01002	0.579885
		165	302	159		2252	2633	2425					3.9916e-05	8.24653e-05	5.78403e-05		0.455084	0.940191	0.65944
		154	321	154		2602	2525	2496					4.26644e-05	9.4501e-05	7.28089e-05		0.486419	1.07741	0.830097
		185	312	198		2525	2658	2650						8.77113e-05		8.77113e-05
		155	325	224		2548	2645	2505					p-jnk
		165	354	215		2658	2458	2268					WT	Control	IVIG-A		WT	Control	IVIG-A
													7.96474e-05	0.000169882	0.000101041		0.478601	1.02082	0.607153
													9.05939e-05	0.000151177	9.34347e-05		0.544379	0.908421	0.561449
										β-actin			9.81532e-05	0.000149473	9.71721e-05		0.589803	0.898184	0.583907
	J	p-jnk				jnk				WT	Control	IVIG-A	8.8637e-05	0.000179126	0.000133184		0.53262	1.07637	0.800303
		WT	Control	IVIG-A		WT	Control	IVIG-A		1528	1325	1325	8.22283e-05	0.000186267	9.79816e-05		0.49411	1.11928	0.588772
		558	958	671		4585	4256	5012		1353	1425	1421	8.28127e-05	0.000162577	0.000115353		0.497622	0.976924	0.693155
		562	1025	645		4585	4758	4858		1425	1525	1521		0.000166417		0.000166417
		595	969	658		4254	4251	4452		1526	1325	1469
		585	1036	854		4325	4365	4365		1524	1490	1546
		595	1154	645		4748	4158	4258		1455	1524	1302
		548	1054	714		4548	4254	4754			1435.67
	K	WT	Control	IVIG-A		WT						Ctrl						IVIGA
		0.351056	0.782638	0.571446		0.487577	0.475312	0.426984	0.486111	0.5	0.402778	1.087	0.901065	1.03025	1.03472	0.993056	0.915278	0.793674	0.64722	0.67561	0.715278	0.636111	0.55
		0.342224	0.648767	0.465998
		0.307428	0.74178	0.486439
		0.35	0.745	0.515
		0.36	0.715	0.458
		0.29	0.659	0.396
	L	WT	Control	IVIG-A		WT						Ctrl						IVIG
		565	981	632		0.55122	0.713171	0.600976	0.609756	0.638049	0.583415	0.957073	1.07902	0.891707	1.09756	1.0361	0.93561	0.616585	0.802927	0.774634	0.6	0.609756	0.837073
		731	1106	823
		616	914	794
		625	1125	615
		654	1062	625
		598	959	858
	M	ΔΔCT
			wt	contol	ivig		wt	contol	ivig
		C1q	0.000119543	0.000284599	0.000190121		0.356845	0.849551	0.567525
			0.000142176	0.000363114	0.000176082		0.424406	1.08392	0.525617
			0.000138565	0.000361912	0.00020428		0.413626	1.08034	0.60979
			0.000115	0.000341	0.000154		0.343284	1.01791	0.459701
			0.000145	0.000336	0.000175		0.432836	1.00299	0.522388
			0.000122	0.000325	0.000158
			wt	contol	ivig		wt	contol	ivig
		c2	0.00444127	0.0118135	0.00742105		0.363949	0.968083	0.608133
			0.00452804	0.0137922	0.00649326		0.37106	1.13023	0.532104
			0.00455341	0.0134458	0.00766028		0.373138	1.10185	0.627738
			0.0042625	0.010214	0.007015		0.349299	0.837007	0.574859
			0.0043252	0.011425	0.007025		0.354437	0.936245	0.575678
			0.0042545	0.012525	0.006858		0.348644	1.02639	0.561993
			wt	contol	ivig		wt	contol	ivig
		c3	0.00635148	0.0110869	0.00930353		0.448266	0.782475	0.656612
			0.00805153	0.0142493	0.0106112		0.56825	1.00567	0.748905
			0.00646899	0.0165734	0.0105059		0.456559	1.16969	0.741473
			0.007154	0.015254	0.010254		0.504905	1.07658	0.723693
			0.007025	0.013596	0.0091524		0.495801	0.95956	0.645945
			0.007748	0.014255	0.010251		0.546828	1.00607	0.723481
			wt	contol	ivig		wt	contol	ivig
		c4	0.0101543	0.0135731	0.0118407		0.564849	0.755027	0.658657
			0.00906982	0.017121	0.0121833		0.504523	0.952383	0.677715
			0.0126099	0.0187943	0.0128413		0.701447	1.04546	0.714317
			0.011425	0.020215	0.010256		0.635534	1.12449	0.570507
			0.009025	0.019568	0.011525		0.50203	1.0885	0.641097
			0.008989	0.018588	0.012425		0.500028	1.03399	0.691161
