# Supplementary material for: Fc-modified IVIG with enhanced blood-brain barrier penetration ameliorates cognitive deficits and neuropathology in A53T α-synuclein transgenic mice
Source: Research Square preprint supplement (doi:10.21203/rs.3.rs-7354381/v1), 2025-09-04
Supplement: Supplementary file 2 [file 7eaa2b4091db84876cdcbae0.docx]

**Legend:** Fc-modified IVIG (IVIGᴬ) with enhanced blood brain barrier penetration reduces α-synuclein aggregation, improves neuronal survival and function, suppresses glia-mediated and complement-mediated inflammation, and ameliorates cognitive deficits and neuropathology in A53T α-synuclein transgenic mice.
