# Supplementary material for: Fc-modified IVIG with enhanced blood-brain barrier penetration ameliorates cognitive deficits and neuropathology in A53T α-synuclein transgenic mice
Source: Research Square preprint supplement (doi:10.21203/rs.3.rs-7354381/v1), 2025-09-04
Supplement: Supplementary file 3 [file b7969c384cb3f2c8a5f52f17.xlsx]

## Sheet: Statistical Catalogue
					Interaction		Column Factor		Residual
Comparison / Panel	Group size (n)	Test used	F (DFn, DFd)	P value	F (DFn, DFd)	P value	F (DFn, DFd)	P value	F (DFn, DFd)	P value	T	df
Fig. 1E	n=6/group	One-way ANOVA with Tukey’s	F (2, 15) = 489.0	P<0.0001
Fig. 1I	n=6 mice/group	Two-tailed Student’s t-test									20.01	10
Fig. 1J	n=6/group	One-way ANOVA with Tukey’s	F (3, 20) = 132.0	P<0.0001
Fig. 1K	n=6/group	One-way ANOVA with Tukey’s	F (3, 20) = 367.0	P<0.0001
Fig. 2C	n=6 mice/group	One-way ANOVA with Tukey’s	F (2, 15) = 12.57	P=0.0006
Fig. 2D	n=6 mice/group	Two-way ANOVA with Tukey’s			F (4, 45) = 6.181	P=0.0005	F (2, 45) = 119.7	P<0.0001	F (2, 45) = 241.7	P<0.0001
Fig. 2F	n=6 mice/group	One-way ANOVA with Tukey’s	F (2, 15) = 21.68	P<0.0001
Fig. 2G	n=6 mice/group	One-way ANOVA with Tukey’s	F (2, 15) = 13.26	P=0.0005
Fig. 2H	n=6 mice/group	One-way ANOVA with Tukey’s	F (2, 15) = 56.74	P<0.0001
Fig. 2I	n=6 mice/group	One-way ANOVA with Tukey’s	F (2, 15) = 49.41	P<0.0001
Fig. 2J	n=6 mice/group	One-way ANOVA with Tukey’s	F (2, 15) = 93.00	P<0.0001
Fig. 2K	n=6 mice/group	One-way ANOVA with Tukey’s	F (2, 15) = 14.55	P=0.0003
Fig. 2M	n=6 mice/group	One-way ANOVA with Tukey’s	F (2, 15) = 30.45	P<0.0001
Fig. 2N	n=6 mice/group	One-way ANOVA with Tukey’s	F (2, 15) = 41.78	P<0.0001
Fig. 3B	n=6/group	Two-way ANOVA with Tukey’s			F (2, 30) = 1.841	P=0.1761	F (1, 30) = 2.475	P=0.1262	F (2, 30) = 333.4	P<0.0001
Fig. 3D	n=6/group	Two-way ANOVA with Tukey’s			F (2, 30) = 0.7060	P=0.5017	F (1, 30) = 0.5025	P=0.4839	F (2, 30) = 983.8	P<0.0001
Fig. 3E	n=6/group	Two-way ANOVA with Tukey’s			F (2, 30) = 1.910	P=0.1657	F (1, 30) = 2.234	P=0.1454	F (2, 30) = 1916	P<0.0001
Fig. 4B	n=6/group	One-way ANOVA with Tukey’s	F (2, 15) = 127.4	P<0.0001
Fig. 4C	n=6/group	One-way ANOVA with Tukey’s	F (2, 15) = 100.9	P<0.0001
Fig. 4D	n=6/group	One-way ANOVA with Tukey’s	F (2, 15) = 345.4	P<0.0001
Fig. 4F	n=6/group	One-way ANOVA with Tukey’s	F (2, 6) = 254.6	P<0.0001
Fig. 4G	n=6/group	One-way ANOVA with Tukey’s	F (2, 15) = 147.5	P<0.0001
Fig. 4H	n=6/group	One-way ANOVA with Tukey’s	F (2, 15) = 72.10	P<0.0001
Fig. 4J	n=6/group	One-way ANOVA with Tukey’s	F (2, 15) = 126.0	P<0.0001
Fig. 4K	n=6/group	One-way ANOVA with Tukey’s	F (2, 15) = 96.37	P<0.0001
Fig. 4L	n=6/group	One-way ANOVA with Tukey’s	F (2, 15) = 498.3	P<0.0001
Fig. 4M	n=6/group	One-way ANOVA with Tukey’s	F (2, 15) = 85.85	P<0.0001
Fig. 5B	n=6/group	Two-way ANOVA with Tukey’s	F (2, 15) = 147.5	P<0.0001
Fig. 5D	n=6/group	Two-way ANOVA with Tukey’s			F (2, 30) = 0.4538	P=.639	F (1, 30) = 0.1760	P=.678	F (2, 30) = 128.0	P<.001
Fig. 5E	n=6/group	Two-way ANOVA with Tukey’s			F (2, 30) = 0.5600	P=0.5771	F (1, 30) = 0.002498	P=0.9605	F (2, 30) = 85.49	P<0.0001
Fig. 5F	n=6/group	Two-way ANOVA with Tukey’s			F (2, 30) = 2.496	P=0.0994	F (1, 30) = 0.5532	P=0.4628	F (2, 30) = 94.00	P<0.0001
Fig. 5H	n=6/group	One-way ANOVA with Tukey’s	F (2, 15) = 100.1	P<0.0001
Fig. 5I	n=6/group	One-way ANOVA with Tukey’s	F (2, 15) = 46.43	P<0.0001
Fig. 5J	n=6/group	One-way ANOVA with Tukey’s	F (2, 15) = 62.06	P<0.0001
Fig. 5K	n=6/group	One-way ANOVA with Tukey’s	F (2, 15) = 95.35	P<0.0001
Fig. 5L	n=6/group	One-way ANOVA with Tukey’s	F (2, 15) = 32.85	P<0.0001
Fig. 5M	n=3/group	Two-way ANOVA with Tukey’s			F (6, 24) = 1.628	P=0.1828	F (3, 24) = 5.438	P=0.0054	F (2, 24) = 91.27	P<0.0001

## Sheet: fig1
	Entries highlighted in red represent cases not meeting the assumptions of normal distribution or equal variance.							statsmodels / Python
	Shapiro–Wilk test	Test of homogeneity of variances	Group size (n)	Test used	Test results
	FIG1E		6
	Blank: W = 0.94, p = .681	W(2, 15) = 3.99, p = .041		Welch's ANOVA test	F(2, 15) = 282.86, p < .001
	IVIG: W = 0.82, p = .085			Dunnett's T3	IVIG vs IVIGA: t(≈6.8) = –21.04, p < .001
	IVIGA: W = 0.90, p = .389
	FIG1I		6
	IVIG: W = 0.91, p = .435	W(1, 10) = 4.74, p = .054		T test	t(10) = −20.01, p < .001
	IVIGA: W = 0.91, p = .442
	Fig. 1J		6
	Blank: W = 0.90, p = .384	W(3, 20) = 1.16, p = .350		Kruskal–Wallis	H(3) = 19.45, p < .001
	NC: W = 0.71, p = .009			Mann–Whitney U	VIG vs IVIGA: U = 17.00, p = 1.000
	IVIG: W = 0.92, p = .502
	IVIGA: W = 0.86, p = .190
	Fig. 1K		6
	Blank: W = 0.97, p = .916	W(3, 20) = 2.07, p = .136		One-way ANOVA	F(3, 20) = 367.05, p < .001
	NC: W = 0.89, p = .324			Dunnett’s	IVIG vs IVIGA: t(10) = 0.57, p = 1.000
	IVIG: W = 0.95, p = .738
	IVIGA: W = 0.96, p = .834
	Fig. 2C		6
	WT: W = 0.64, p = .001	W(2, 15) = 0.20, p = .821		Kruskal–Wallis	H(2) = 10.74, p = .005
	Control: W = 0.87, p = .212			Mann–Whitney U	Control vs IVIG-A: U = 31.50, p = .082
	IVIG-A: W = 0.83, p = .101
	Fig. 2D		6
	Day1	W(2, 15) = 3.19, p = .070		Two-way ANOVA	Group F(2, 45) = 241.74, p < .001
	WT: W = 0.92, p = .530				Day F(2, 45) = 119.67, p < .001
	Ctrl: W = 0.97, p = .885				Group × Day F(4, 45) = 6.18, p < .001
	IVIGA: W = 0.95, p = .701			Dunnett’s
	Day2	W(2, 15) = 0.11, p = .897		Day1	Ctrl vs. IVIGA p=0.1353
	WT: W = 0.94, p = .631			Day1	Ctrl vs. IVIGA p<0.0001
	Ctrl: W = 0.95, p = .754			Day1	Ctrl vs. IVIGA p<0.0001
	IVIGA: W = 0.80, p = .061
	Day3	W(2, 15) = 1.07, p = .367
	WT: W = 0.96, p = .820
	Ctrl: W = 0.92, p = .529
	IVIGA: W = 0.93, p = .616
	Fig. 2F		6
	WT: W = 0.91, p = .428	W(2, 15) = 1.16, p = .341		One-way ANOVA	F(2, 15) = 21.68, p < .001
	Ctrl: W = 0.95, p = .718			Dunnett’s	Ctrl vs IVIGA: p = .001
	IVIGA: W = 0.91, p = .466
	Fig. 2G		6
	WT: W = 0.96, p = .822	W(2, 15) = 0.20, p = .820		One-way ANOVA	F(2, 15) = 13.26, p < .001
	Ctrl: W = 0.88, p = .281			Dunnett’s	Ctrl vs IVIGA: p = .019
	IVIGA: W = 0.95, p = .775
	Fig. 2H		6
	WT: W = 0.89, p = .345	W(2, 15) = 0.49, p = .620		One-way ANOVA	F(2, 15) = 56.74, p < .001
	Ctrl: W = 0.86, p = .184			Dunnett’s	Ctrl vs IVIGA: p = .014
	IVIGA: W = 0.81, p = .077
	Fig. 2I		6
	WT: W = 0.68, p = .004	W(2, 15) = 1.76, p = .206		Kruskal–Wallis	H(2) = 14.76, p < .001
	W = 0.81, p = .065			Mann–Whitney U	Control vs IVIG-A: U = 34.00, p = .031
	IVIG-A: W = 0.83, p = .101
	Fig. 2J		6
	WT: W = 0.82, p = .091	W(2, 15) = 0.44, p = .651		Kruskal–Wallis	H(2) = 15.35, p < .001
	Control: W = 0.77, p = .033			Mann–Whitney U	Control vs IVIG-A: U = 36.00, p = .014
	IVIG-A: W = 0.91, p = .415
	Fig. 2K		6
	WT: W = 0.91, p = .456	W(2, 15) = 0.44, p = .655		One-way ANOVA	F(2, 15) = 14.55, p < .001
	Ctrl: W = 0.95, p = .714			Dunnett’s	Ctrl vs IVIGA: p = .001
	IVIGA: W = 0.87, p = .243
	Fig. 2M		6
	WT: W = 0.78, p = .038	W(2, 15) = 1.49, p = .258		Kruskal–Wallis	H(2) = 15.17, p < .001
	Ctrl: W = 0.89, p = .341			Mann–Whitney U	Ctrl vs IVIGA: U = 0.00, p = .015
	IVIGA: W = 0.98, p = .928
	Fig. 2N		6
	WT: W = 0.95, p = .766	W(2, 15) = 1.24, p = .318		One-way ANOVA	F(2, 15) = 41.78, p < .001
	Ctrl: W = 0.79, p = .052			Dunnett’s	Ctrl vs IVIGA: p < .001
	IVIGA: W = 0.94, p = .670
	Fig. 3B
	SN		6
	WT: W = 0.97, p = .914	W(2, 15) = 4.85, p = .024		Welch’s ANOVA	F(2, 15) = 212.39, p < .001
	Ctrl: W = 0.93, p = .560			Dunnett's T3	Ctrl vs IVIGA: t(≈6.9) = 6.34, p < .001
	IVIGA: W = 0.89, p = .313
	CTX		6
	WT: W = 0.86, p = .049	W(2, 33) = 13.80, p < .001		Kruskal–Wallis	H(2) = 30.92, p < .001
	Ctrl: W = 0.95, p = .627			Mann–Whitney U	Ctrl vs IVIGA: U = 143.00, p < .001
	IVIGA: W = 0.94, p = .440
	Fig. 3D
	SN		6
	WT: W = 0.98, p = .963	W(2, 15) = 4.61, p = .027		Welch’s ANOVA	F(2, 15) = 2575.70, p < .001
	Ctrl: W = 0.93, p = .566			Dunnett's T3	Ctrl vs IVIGA: t(≈5.8) = 11.19, p < .001
	IVIGA: W = 0.96, p = .806
	CTX		6
	WT: W = 0.95, p = .637	W(2, 33) = 10.19, p < .001		Welch’s ANOVA	(2, 33) = 5333.83, p < .001
	Ctrl: W = 0.93, p = .396			Dunnett's T3	Ctrl vs IVIGA: t(≈6.8) = 13.42, p < .001
	IVIGA: W = 0.96, p = .732
	Fig. 3E
	SN		6
	WT: W = 0.82, p = .097	W(2, 15) = 4.18, p = .036		Welch’s ANOVA	F(2, 15) = 4637.38, p < .001
	Ctrl: W = 0.96, p = .802			Dunnett's T3	Ctrl vs IVIGA: t(≈5.9) = 15.34, p < .001
	IVIGA: W = 0.94, p = .629
	CTX		6
	WT: W = 0.91, p = .217	W(2, 33) = 10.41, p < .001		Welch’s ANOVA	F(2, 33) = 9389.66, p < .001
	Ctrl: W = 0.97, p = .948			Dunnett's T3	Ctrl vs IVIGA: t(≈6.5) = 14.93, p < .001
	IVIGA: W = 0.89, p = .129
	Fig. 4B		6
	WT: W = 0.99, p = .993	W(2, 15) = 0.59, p = .567		One-way ANOVA	F(2, 15) = 127.37, p < .001
	Ctrl: W = 0.91, p = .460			Dunnett’s	Ctrl vs IVIGA: t(15) = –5.49, p < .001
	IVIGA: W = 0.80, p = .054
	Fig. 4C		6
	WT: W = 0.94, p = .688	W(2, 15) = 0.20, p = .825		Kruskal–Wallis	H(2) = 15.16, p < .001
	Ctrl: W = 0.89, p = .334			Mann–Whitney U test	Ctrl vs IVIGA: U = 0.00, p = .006
	IVIGA: W = 0.72, p = .010
	Fig. 4D		6
	WT: W = 0.94, p = .666	W(2, 15) = 3.31, p = .064		One-way ANOVA	F(2, 15) = 124.29, p < .001
	Ctrl: W = 0.85, p = .148			Dunnett’s	Ctrl vs IVIGA: t(15) = –14.52, p < .001
	IVIGA: W = 0.92, p = .503
	Fig. 4F		6
	WT: W = 0.95, p = .734	W(2, 15) = 0.98, p = .398		One-way ANOVA	F(2, 15) = 345.41, p < .001
	Ctrl: W = 0.92, p = .471			Dunnett’s	Ctrl vs IVIGA: t(15) = –7.97, p < .001
	IVIGA: W = 0.89, p = .324
	Fig. 4G		6
	WT: W = 0.86, p = .184	W(2, 15) = 0.49, p = .622		One-way ANOVA	F(2, 15) = 147.45, p < .001
	Ctrl: W = 0.83, p = .103			Dunnett’s	Ctrl vs IVIGA: t(15) = –6.88, p < .001
	IVIGA: W = 0.92, p = .530
	Fig. 4H		6
	WT: W = 0.84, p = .120	W(2, 15) = 0.58, p = .571		Kruskal–Wallis	H(2) = 15.17, p < .001
	Ctrl: W = 0.79, p = .047			Mann–Whitney U	Ctrl vs IVIGA: U = 0.00, p = .015
	IVIGA: W = 0.98, p = .956
	Fig. 4J		6
	WT: W = 0.97, p = .898	W(2, 15) = 0.44, p = .651		Kruskal–Wallis	H(2) = 15.16, p < .001
	Ctrl: W = 0.75, p = .022			Mann–Whitney U	Ctrl vs IVIGA: U = 0.00, p = .006
	IVIGA: W = 0.89, p = .335
	Fig. 4K		6
	WT: W = 0.93, p = .549	W(2, 15) = 0.09, p = .916		One-way ANOVA	F(2, 15) = 96.37, p < .001
	Ctrl: W = 0.89, p = .321			Dunnett’s	Ctrl vs IVIGA: t(15) = –8.11, p < .001
	IVIGA: W = 0.93, p = .573
	Fig. 4L		6
	WT: W = 0.97, p = .880	W(2, 15) = 0.29, p = .751		One-way ANOVA	F(2, 15) = 167.33, p < .001
	Ctrl: W = 0.92, p = .426			Dunnett’s	Ctrl vs IVIGA: t(15) = –8.71, p < .001
	IVIGA: W = 0.96, p = .760
	Fig. 4M		6
	WT: W = 0.96, p = .820	W(2, 15) = 0.13, p = .881		One-way ANOVA	F(2, 15) = 156.01, p < .001
	Ctrl: W = 0.93, p = .505			Dunnett’s	Ctrl vs IVIGA: t(15) = –9.30, p < .001
	IVIGA: W = 0.94, p = .604
	Fig. 5B
	SN		6
	WT: W = 0.98, p = .948	W(2, 15) = 0.42, p = .665		One-way ANOVA	F(2, 15) = 106.55, p < .001
	Control: W = 0.97, p = .892			Dunnett’s	Control vs IVIG-A: t(15) = 5.00, p < .001
	IVIG-A: W = 0.96, p = .779
	CTX		6
	WT: W = 0.95, p = .724	W(2, 15) = 0.65, p = .537		One-way ANOVA	F(2, 15) = 173.42, p < .001
	Control: W = 0.96, p = .815			Dunnett’s	Control vs IVIG-A: t(15) = 8.10, p < .001
	IVIG-A: W = 0.95, p = .708
	Fig. 5D
	SN		6
	WT: W = 0.96, p = .810	W(2, 15) = 0.44, p = .650		One-way ANOVA	F(2, 15) = 88.37, p < .001
	Ctrl: W = 0.95, p = .682			Dunnett’s	Ctrl vs IVIGA: t(15) = 6.62, p < .001
	IVIGA: W = 0.92, p = .462
	CTX		6
	WT: W = 0.96, p = .590	W(2, 33) = 0.86, p = .435		One-way ANOVA	F(2, 33) = 98.26, p < .001
	Ctrl: W = 0.95, p = .499			Dunnett’s	Ctrl vs IVIGA: t(33) = 5.20, p < .001
	IVIGA: W = 0.95, p = .535
	Fig. 5E
	SN		6
	WT: W = 0.94, p = .621	W(2, 15) = 0.57, p = .575		One-way ANOVA	F(2, 15) = 19.46, p < .001
	Ctrl: W = 0.94, p = .644			Dunnett’s	Ctrl vs IVIGA: t(15) = 3.08, p = .022
	IVIGA: W = 0.97, p = .917
	CTX		6
	WT: W = 0.97, p = .850	W(2, 33) = 0.21, p = .811		One-way ANOVA	F(2, 33) = 24.72, p < .001
	Ctrl: W = 0.95, p = .451			Dunnett’s	Ctrl vs IVIGA: t(33) = 4.20, p < .001
	IVIGA: W = 0.97, p = .907
	Fig. 5F
	SN		6
	WT: W = 0.95, p = .684	W(2, 15) = 0.31, p = .736		One-way ANOVA	F(2, 15) = 29.55, p < .001
	Ctrl: W = 0.96, p = .827			Dunnett’s	Ctrl vs IVIGA: t(15) = 4.42, p < .001
	IVIGA: W = 0.97, p = .894
	CTX		6
	WT: W = 0.95, p = .327	W(2, 33) = 0.23, p = .798		One-way ANOVA	F(2, 33) = 42.71, p < .001
	Ctrl: W = 0.94, p = .260			Dunnett’s	Ctrl vs IVIGA: t(33) = 5.29, p < .001
	IVIGA: W = 0.97, p = .727
	Fig. 5H		6
	WT: W = 0.97, p = .916	W(2, 15) = 0.19, p = .829		One-way ANOVA	F(2, 15) = 106.12, p < .001
	Control: W = 0.97, p = .873			Dunnett’s	Control vs IVIG-A: t(15) = 6.98, p < .001
	IVIG-A: W = 0.95, p = .693
	Fig. 5I		6
	WT: W = 0.97, p = .889	W(2, 15) = 0.24, p = .788		One-way ANOVA	F(2, 15) = 34.73, p < .001
	Control: W = 0.98, p = .959			Dunnett’s	Control vs IVIG-A: t(15) = 3.68, p = .004
	IVIG-A: W = 0.96, p = .832
	Fig. 5J		6
	WT: W = 0.97, p = .912	W(2, 15) = 0.37, p = .696		One-way ANOVA	F(2, 15) = 35.11, p < .001
	Control: W = 0.97, p = .873			Dunnett’s	Control vs IVIG-A: t(15) = 4.37, p < .001
	IVIG-A: W = 0.98, p = .945
	Fig. 5K		6
	WT: W = 0.96, p = .834	W(2, 15) = 0.39, p = .683		One-way ANOVA	F(2, 15) = 57.42, p < .001
	Ctrl: W = 0.94, p = .585			Dunnett’s	Ctrl vs IVIGA: t(15) = 4.75, p < .001
	IVIGA: W = 0.94, p = .612
	Fig. 5L		6
	WT: W = 0.97, p = .904	W(2, 15) = 0.27, p = .766		One-way ANOVA	F(2, 15) = 26.53, p < .001
	Ctrl: W = 0.94, p = .562			Dunnett’s	Ctrl vs IVIG: t(15) = 4.94, p < .001
	IVIG: W = 0.95, p = .683
	Fig. 5M
	C1Q		6
	WT: W = 0.97, p = .892	W(2, 12) = 0.47, p = .635		One-way ANOVA	F(2, 12) = 47.11, p < .001
	Control: W = 0.94, p = .626			Dunnett’s	Control vs IVIG: t(12) = 5.78, p < .001
	IVIG: W = 0.96, p = .793
	C2		6
	WT: W = 0.98, p = .944	W(2, 15) = 0.19, p = .829		One-way ANOVA	F(2, 15) = 64.22, p < .001
	Control: W = 0.96, p = .810			Dunnett’s	Control vs IVIG: t(15) = 5.36, p < .001
	IVIG: W = 0.98, p = .959
	C3		6
	WT: W = 0.97, p = .887	W(2, 15) = 0.21, p = .815		One-way ANOVA	F(2, 15) = 19.81, p < .001
	Control: W = 0.96, p = .824			Dunnett’s	Control vs IVIG: t(15) = 3.11, p = .022
	IVIG: W = 0.95, p = .676
	C4		6
	WT: W = 0.97, p = .875	W(2, 15) = 0.25, p = .783		One-way ANOVA	F(2, 15) = 21.46, p < .001
	Control: W = 0.97, p = .893			Dunnett’s	Control vs IVIG: t(15) = 4.56, p < .001
	IVIG: W = 0.96, p = .803
